# Supplementary material for: Aspirin Use Reduces the Risk of Aggressive Prostate Cancer and Disease Recurrence in African-American Men
Source: Oxford University Press journal article supplement (doi:10.1158/1055-9965.epi-16-1027), 2017-03-14
Supplement: 10559965epi161027-sup-176240_2_supp_3882836_zlwd4k.pdf [file 10559965epi161027-sup-176240_2_supp_3882836_zlwd4k.pdf]

**A**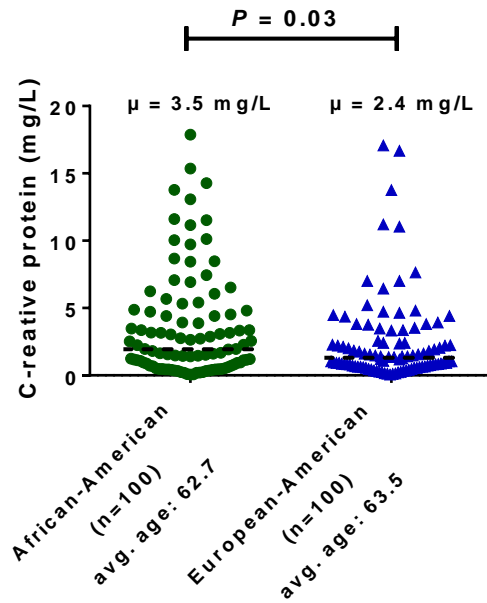**B**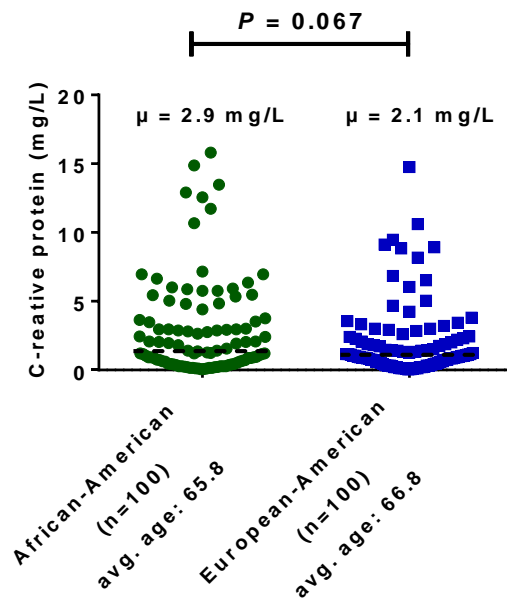

**Supplementary Figure 1.** Increased C-reactive protein (CRP) plasma level in African-American (AA) men. Differences in CRP plasma level between AA and European-American (EA) men. CRP was measured in plasma samples of cases (100 AA, 100 EA) and controls (100 AA, 100 EA). **(A)** CRP levels are significantly higher in AA patients compared with EA patients. **(B)** CRP plasma levels are higher in AA controls compared with EA controls, albeit not statistically significant. Two-sided Mann-Whitney U test.  $\mu$  = mean.
